# Supplementary material
Source: MDPI journal article supplement (https://www.mdpi.com/1999-4907/10/2/136)

**Supplementary Figure 3:** Cladogram with respective conclusions inferred with ANECA. Colored clusters represent statistically supported (>85% posterior probability) clades of the phylogenetic tree (colors identical with Figure 1).

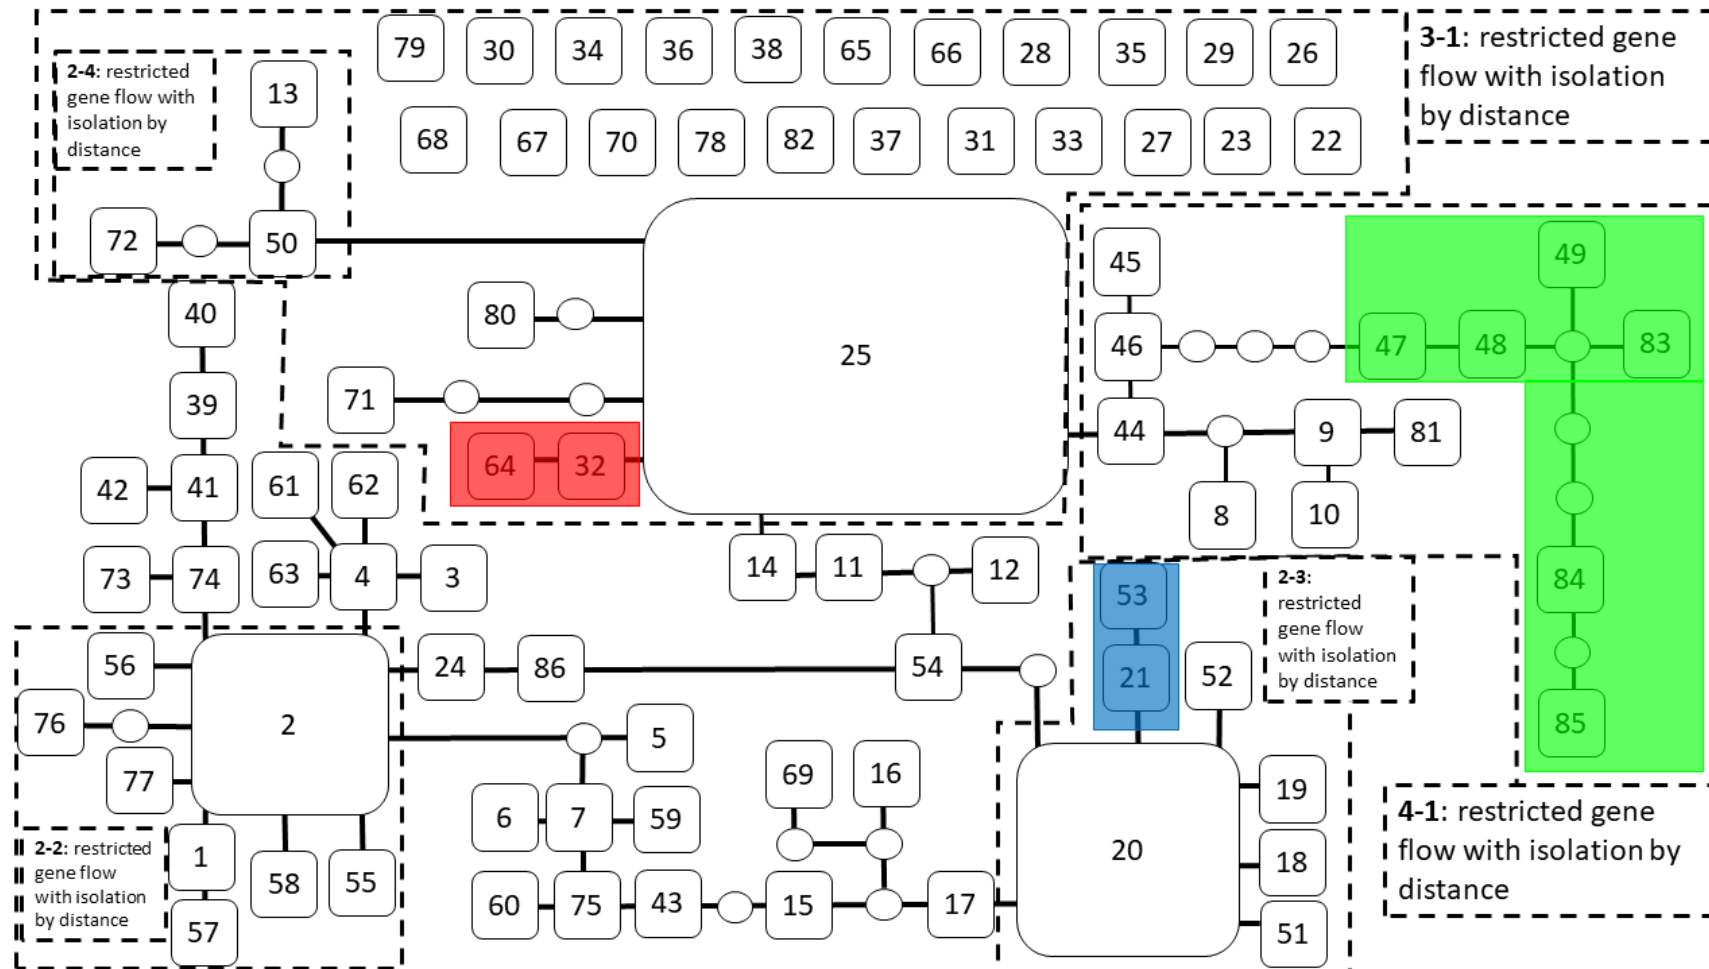

Supplement: s1 [file s1]
