# Supplementary material
Source: MDPI journal article supplement (https://www.mdpi.com/1999-4907/10/2/136)

**Supplementary Figure 2:** Mismatch distribution diagram inferred from the mitochondrial DNA sequences of *I. sexdentatus*.

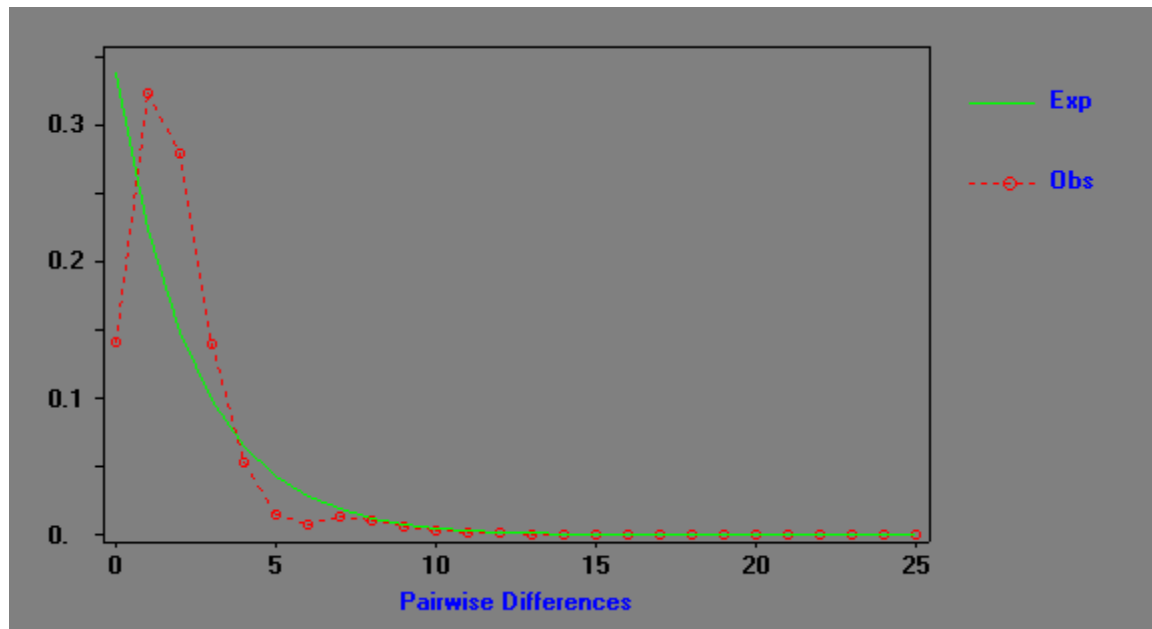

Supplement: s1 [file s1]
