# Supplementary material
Source: MDPI journal article supplement (https://www.mdpi.com/1999-4907/10/2/136)
Supplement: s1 [file s1]

1 **Supplementary Figure 5:** Distribution of haplotype diversity (based on Tamura-Nei distance)  
2 over the populations sampled. Red color indicates points of high and blue color shows areas of  
3 low diversity.

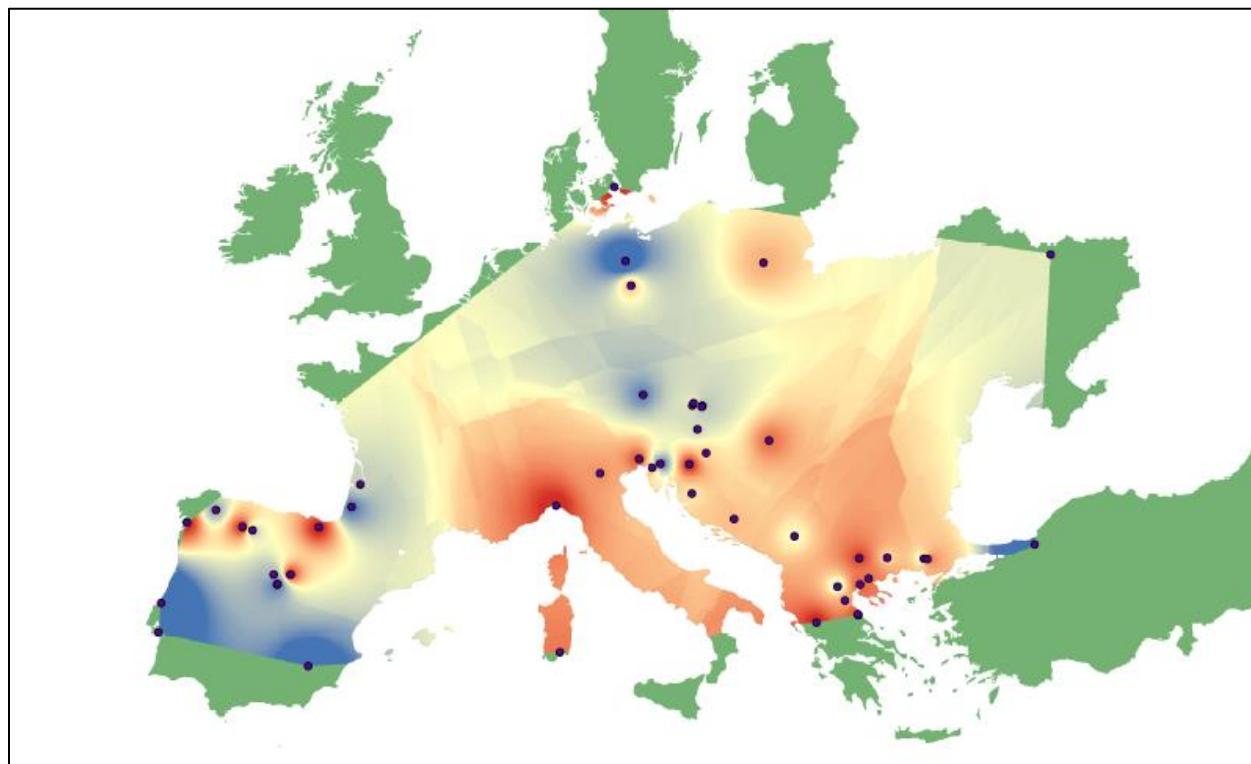

4  
5  
6  
7  
8
