# Supplementary material
Source: MDPI journal article supplement (https://www.mdpi.com/1999-4907/10/2/136)

**Supplementary Figure 1:** Correlation of haplotypes retrieved against the number of individuals analyzed in bark beetle species phylogenetic studies.

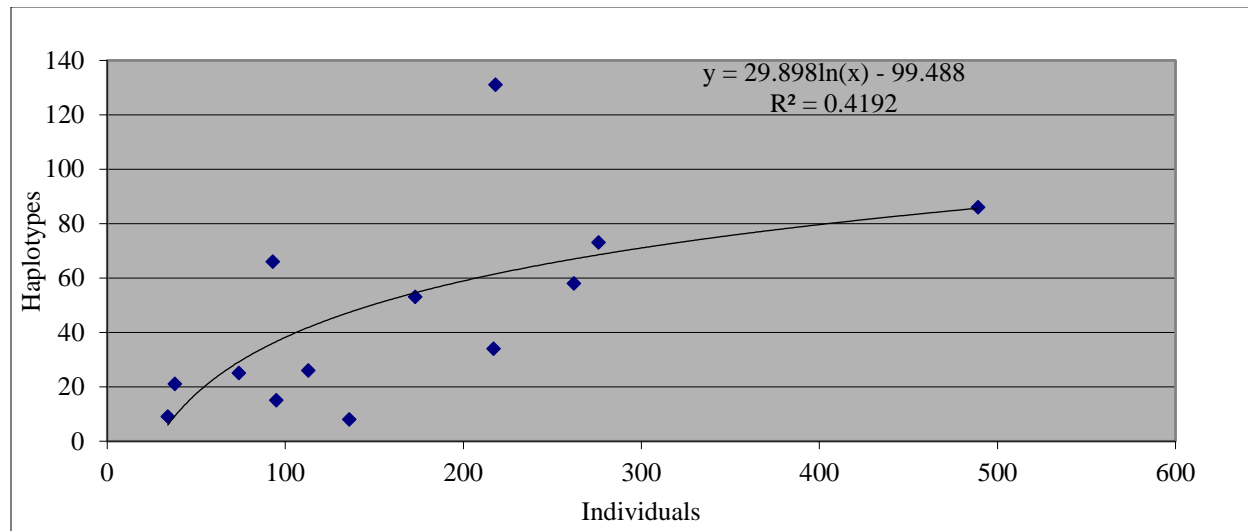

Supplement: s1 [file s1]
