# Supplementary material
Source: MDPI journal article supplement (https://www.mdpi.com/1999-4907/10/2/136)

**Supplementary Figure 4:** Landscape of genetic diversity created with Alleles in Space; peaks represent areas of high genetic distance among individuals and troughs point out areas of low genetic distance.

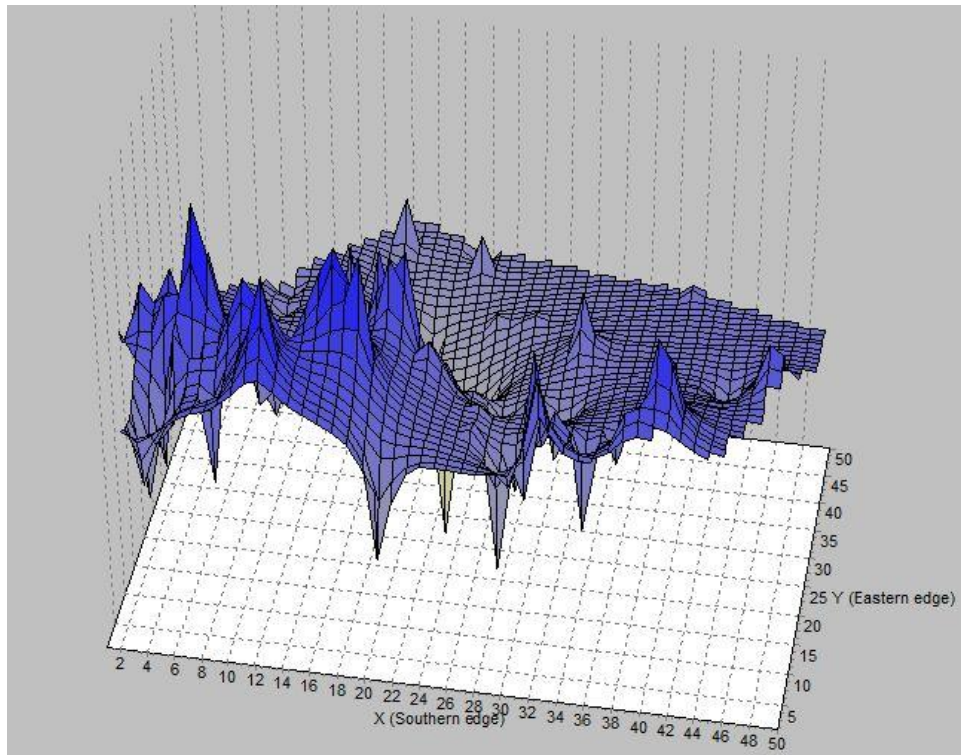

Supplement: s1 [file s1]
