# Supplementary material
Source: MDPI journal article supplement (https://www.mdpi.com/1999-4907/10/2/136)
Supplement: s1 [file s1]

**1     Supplementary Table 1:** Individuals analyzed per population, and their haplotype assignment

|       | Latitude      | Longitude     | N  | Country  | Haplotypes                                                                                       |
|-------|---------------|---------------|----|----------|--------------------------------------------------------------------------------------------------|
| Pop1  | 41°30'36.10"N | 24°30'3.78"E  | 31 | Greece   | IS1[1]:IS2[12]:IS4[3]:IS14[1]:<br>IS15[1]:IS19[1]:IS20[1]:<br>IS25[9]:IS39[1]:IS41[1]            |
| Pop2  | 40°17'27.71"N | 22°15'44.09"E | 12 | Greece   | IS2[4]:IS4[1]:IS10[1]:IS20[4]:<br>IS21[1]:IS40[1]                                                |
| Pop3  | 40°48'0.76"N  | 22° 2'29.76"E | 3  | Greece   | IS4[1]:IS20[2]                                                                                   |
| Pop4  | 47°40'48.33"N | 16°35'8.91"E  | 10 | Hungary  | IS22[1]:IS25[8]:IS41[1]                                                                          |
| Pop5  | 45°31'20.54"N | 11° 9'50.91"E | 11 | Italy    | IS7[2]:IS13[4]:IS25[1]:IS37[1]:<br>IS41[1]:IS43[2]                                               |
| Pop6  | 42°25'48.14"N | 8°38'37.12"W  | 1  | Italy    | IS25[1]                                                                                          |
| Pop7  | 43° 3'43.84"N | 7°26'43.59"W  | 8  | Spain    | IS24[2]:IS25[5]:IS43[1]                                                                          |
| Pop8  | 41°39'20.00"N | 23°13'27.00"E | 11 | Bulgaria | IS1[1]:IS2[2]:IS3[1]:IS4[1]:<br>IS14[1]:IS16[1]:IS17[1]:<br>IS18[1]:IS20[2]                      |
| Pop9  | 45°40'18.38"N | 15°39'2.84"E  | 2  | Croatia  | IS2[1]:IS25[1]                                                                                   |
| Pop10 | 44°38'13.23"N | 15°39'40.08"E | 11 | Croatia  | IS2[5]:IS5[1]:IS8[1]:IS20[1]:<br>IS25[3]                                                         |
| Pop11 | 48°13'38.71"N | 13°32'56.78"E | 10 | Austria  | IS23[1]:IS25[7]:IS32[1]:IS50[1]                                                                  |
| Pop12 | 47°43'34.32"N | 16° 4'51.17"E | 17 | Austria  | IS2[1]:IS12[1]:IS24[1]:IS25[10]:<br>IS32[1]:IS33[1]:IS34[1]:IS45[1]                              |
| Pop13 | 47°48'21.10"N | 16° 8'37.46"E | 12 | Austria  | IS2[2]:IS20[1]:IS23[1]:IS25[6]:<br>IS35[1]:IS36[1]                                               |
| Pop14 | 49°59'36.60"N | 36°13'49.36"E | 34 | Ukraine  | IS24[1]:IS25[18]:IS27[2]:IS29[1]:<br>IS32[2]:IS38[1]:IS41[1]:IS42[1]:<br>IS44[5]:IS46[1]:IS71[1] |
| Pop15 | 46°52'49.14"N | 16°13'24.23"E | 24 | Hungary  | IS2[11]:IS4[1]:IS11[4]:IS25[8]                                                                   |
| Pop16 | 44°44'23.11"N | 0°46'1.35"W   | 21 | France   | IS6[1]:IS7[11]:IS9[1]:IS25[6]:<br>IS30[1]:IS31[1]                                                |
| Pop17 | 45°38'58.80"N | 13°46'41.21"E | 4  | Italy    | IS2[1]:IS25[2]:IS28[1]                                                                           |
| Pop18 | 44°24'31.65"N | 8°56'43.64"E  | 1  | Italy    | IS13[1]                                                                                          |
| Pop19 | 45°59'1.95"N  | 13°10'6.18"E  | 7  | Italy    | IS2[2]:IS4[1]:IS28[1]:IS47[1]:<br>IS48[1]:IS49[1]                                                |
| Pop20 | 40°52'2.56"N  | 4° 1'55.24"W  | 10 | Spain    | IS25[7]:IS44[1]:IS78[1]:IS81[1]                                                                  |
| Pop21 | 40°53'53.57"N | 4° 0'31.35"W  | 10 | Spain    | IS25[7]:IS43[1]:IS44[2]                                                                          |
| Pop22 | 42°35'58.27"N | 5°33'46.62"W  | 9  | Spain    | IS24[5]:IS25[3]:IS44[1]                                                                          |
| Pop23 | 38°11'58.60"N | 2° 9'18.03"W  | 6  | Spain    | IS25[5]:IS82[1]                                                                                  |
| Pop24 | 40°45'4.47"N  | 23° 4'8.69"E  | 6  | Greece   | IS2[2]:IS14[1]:IS20[1]:IS26[1]:<br>IS29[1]                                                       |
| Pop25 | 47°40'29.41"N | 16°35'4.80"E  | 8  | Hungary  | IS2[1]:IS20[1]:IS25[3]:IS41[1]:<br>IS50[1]:IS59[1]                                               |
| Pop26 | 46°11'53.16"N | 19°46'59.55"E | 5  | Hungary  | IS4[1]:IS25[2]:IS79[1]:IS80[1]                                                                   |
| Pop27 | 41°14'18.73"N | 26° 8'15.13"E | 8  | Greece   | IS2[5]:IS14[1]:IS20[1]:IS60[1]                                                                   |
| Pop28 | 39°39'54.10"N | 20°51'13.49"E | 1  | Greece   | IS25[1]                                                                                          |
| Pop29 | 43°55'13.57"N | 1° 2'9.24"W   | 20 | France   | IS7[14]:IS13[2]:IS25[1]:IS30[1]:<br>IS37[1]:IS75[1]                                              |
| Pop30 | 39°13'24.62"N | 9° 7'17.18"E  | 9  | Italy    | IS37[1]:IS48[2]:IS49[3]:IS83[1]:<br>IS84[1]:IS85[1]                                              |
| Pop31 | 39°42'49.14"N | 22°45'30.68"E | 6  | Greece   | IS2[1]:IS20[1]:IS51[1]:IS52[1]:<br>IS53[1]:IS58[1]                                               |
| Pop32 | 40°54'28.89"N | 23°30'0.67"E  | 10 | Greece   | IS2[2]:IS14[2]:IS20[3]:IS25[1]:<br>IS40[1]:IS55[1]                                               |
| Pop33 | 41°11'35.30"N | 26°17'57.16"E | 10 | Greece   | IS2[1]:IS14[2]:IS25[2]:IS40[1]:<br>IS56[1]:IS58[1]:IS61[1]:IS63[1]                               |
| Pop34 | 45°46'24.09"N | 14°12'48.85"E | 11 | Slovenia | IS2[8]:IS11[1]:IS25[1]:IS32[1]                                                                   |
| Pop35 | 52°57'59.48"N | 12°59'0.79"E  | 6  | Germany  | IS25[5]:IS41[1]                                                                                  |
| Pop36 | 52° 5'42.06"N | 13°14'12.63"E | 10 | Germany  | IS24[1]:IS25[4]:IS32[1]:IS41[3]:<br>IS64[1]                                                      |
| Pop37 | 47°38'51.99"N | 16°33'20.01"E | 3  | Hungary  | IS25[2]:IS32[1]                                                                                  |

|              |               |               |    |          |                                                                                                         |
|--------------|---------------|---------------|----|----------|---------------------------------------------------------------------------------------------------------|
| <b>Pop38</b> | 42°45'40.76"N | 20°22'45.13"E | 6  | Kosovo   | IS2[2]:IS4[1]:IS20[3]                                                                                   |
| <b>Pop39</b> | 52°22'40.95"N | 20°55'1.36"E  | 21 | Poland   | IS11[2]:IS25[9]:IS35[1]:IS44[1]:<br>IS45[1]:IS65[1]:IS66[1]:IS67[1]:<br>IS68[1]:IS70[1]:IS72[1]:IS73[1] |
| <b>Pop40</b> | 39°44'15.20"N | 22°45'16.27"E | 15 | Greece   | IS2[5]:IS3[1]:IS4[2]:IS20[2]:<br>IS21[1]:IS52[1]:IS53[1]:IS74[1]:<br>IS77[1]                            |
| <b>Pop41</b> | 43°36'9.93"N  | 17°36'8.43"E  | 22 | Bosnia   | IS2[7]:IS20[7]:IS25[2]:IS54[1]:<br>IS57[2]:IS62[1]:IS68[1]:IS76[1]                                      |
| <b>Pop42</b> | 41°12'16.22"N | 4°15'26.64"W  | 15 | Spain    | IS7[2]:IS25[9]:IS44[1]:IS61[1]:<br>IS69[2]                                                              |
| <b>Pop43</b> | 2°39'20.08"N  | 6° 3'37.21"W  | 1  | Spain    | IS24[1]                                                                                                 |
| <b>Pop44</b> | 1°16'48.72"N  | °28'52.04"W   | 1  | Spain    | IS25[1]                                                                                                 |
| <b>Pop45</b> | 43° 3'46.38"N | °29'23.26"W   | 1  | Spain    | IS61[1]                                                                                                 |
| <b>Pop46</b> | 46° 1'16.53"N | 6°32'49.02"E  | 19 | Croatia  | IS2[1]:IS4[1]:IS20[8]:IS25[4]:<br>IS34[2]:IS50[3]                                                       |
| <b>Pop47</b> | 5°36'28.44"N  | 2°34'10.27"E  | 1  | Denmark  | IS30[1]                                                                                                 |
| <b>Pop48</b> | 40°50'13.41"N | 31° 9'47.86"E | 2  | Turkey   | IS86[2]                                                                                                 |
| <b>Pop49</b> | 39°32'25.13"N | 9° 2'9.23"W   | 3  | Portugal | IS25[3]                                                                                                 |
| <b>Pop50</b> | 8°31'19.42"N  | °53'38.70"W   | 4  | Portugal | IS25[3]:IS44[1]                                                                                         |
