# Supplementary material
Source: MDPI journal article supplement (https://www.mdpi.com/1999-4907/10/2/136)
Supplement: s1 [file s1]

Archive with 6 entries (6 files):
- Supplementary Figure S1.pdf
- Supplementary Figure S2.pdf
- Supplementary Figure S3.pdf
- Supplementary Figure S4.pdf
- Supplementary Figure S5.pdf
- Supplementary Table S1.pdf
